# Supplementary material
Source: PubMed Central journal article supplement (PMC9128411)
Supplement: NIHMS1799884-supplement-Supp_Info_3.pdf [file NIHMS1799884-supplement-Supp_Info_3.pdf]

**ASD Prevalence and Cases by State Using  
Age Range 6-17 NSCH Data:  
Supplemental Tables**

# Results

**Table 1:** State estimated ASD prevalence, cases, and associated 95% simulation interval (SI).

| <b>State</b>         | <b>Cases</b> | <b>95% SI</b>  | <b>Prevalence</b> | <b>95% SI</b> |
|----------------------|--------------|----------------|-------------------|---------------|
| Alabama              | 83076        | 65657, 103051  | 2.25              | 1.78, 2.79    |
| Alaska               | 13138        | 10395, 16297   | 2.40              | 1.90, 2.97    |
| Arizona              | 124947       | 99463, 154288  | 2.38              | 1.90, 2.94    |
| Arkansas             | 48571        | 38299, 59966   | 2.17              | 1.71, 2.68    |
| California           | 750615       | 602932, 921511 | 2.52              | 2.03, 3.10    |
| Colorado             | 106292       | 87281, 127965  | 2.50              | 2.05, 3.00    |
| Connecticut          | 66680        | 53448, 82207   | 2.42              | 1.94, 2.99    |
| Delaware             | 16950        | 13460, 20986   | 2.30              | 1.82, 2.84    |
| District of Columbia | 12099        | 9535, 15052    | 2.17              | 1.71, 2.70    |
| Florida              | 354433       | 281862, 435853 | 2.18              | 1.74, 2.69    |
| Georgia              | 187512       | 150102, 230413 | 2.41              | 1.93, 2.96    |
| Hawaii               | 24981        | 19928, 30827   | 2.31              | 1.84, 2.85    |
| Idaho                | 29000        | 23422, 35373   | 2.33              | 1.88, 2.84    |
| Illinois             | 235161       | 188743, 288235 | 2.44              | 1.96, 2.99    |
| Indiana              | 119083       | 95617, 145675  | 2.40              | 1.93, 2.94    |
| Iowa                 | 55293        | 45142, 66591   | 2.37              | 1.93, 2.85    |
| Kansas               | 50863        | 40934, 62259   | 2.38              | 1.92, 2.92    |
| Kentucky             | 74819        | 59382, 92391   | 2.22              | 1.77, 2.75    |
| Louisiana            | 74816        | 59001, 92741   | 2.14              | 1.69, 2.65    |
| Maine                | 26130        | 21005, 31919   | 2.49              | 2.00, 3.04    |
| Maryland             | 109481       | 88058, 133763  | 2.39              | 1.92, 2.92    |
| Massachusetts        | 136723       | 109356, 168538 | 2.57              | 2.05, 3.16    |
| Michigan             | 176731       | 140757, 217832 | 2.33              | 1.86, 2.88    |
| Minnesota            | 102144       | 84040, 122723  | 2.46              | 2.02, 2.95    |
| Mississippi          | 48982        | 38046, 61738   | 2.21              | 1.71, 2.78    |
| Missouri             | 103502       | 82727, 126643  | 2.25              | 1.80, 2.75    |

Continued on next page

**Table 1:** State estimated ASD prevalence, cases, and associated 95% simulation interval (SI).

| <b>State</b>   | <b>Cases</b> | <b>95% SI</b>    | <b>Prevalence</b> | <b>95% SI</b> |
|----------------|--------------|------------------|-------------------|---------------|
| Montana        | 18866        | 14918, 23393     | 2.36              | 1.87, 2.93    |
| Nebraska       | 32205        | 25844, 39590     | 2.30              | 1.84, 2.83    |
| Nevada         | 53825        | 43049, 66064     | 2.37              | 1.90, 2.91    |
| New Hampshire  | 26052        | 21212, 31487     | 2.47              | 2.01, 2.99    |
| New Jersey     | 164683       | 133011, 200719   | 2.41              | 1.95, 2.94    |
| New Mexico     | 32630        | 25379, 41065     | 2.09              | 1.63, 2.63    |
| New York       | 379225       | 306814, 462154   | 2.49              | 2.01, 3.03    |
| North Carolina | 166965       | 131983, 207113   | 2.14              | 1.69, 2.66    |
| North Dakota   | 12698        | 10119, 15620     | 2.26              | 1.80, 2.78    |
| Ohio           | 201740       | 160630, 247637   | 2.29              | 1.83, 2.82    |
| Oklahoma       | 67058        | 53681, 82606     | 2.31              | 1.85, 2.85    |
| Oregon         | 76418        | 61781, 93049     | 2.40              | 1.94, 2.92    |
| Pennsylvania   | 247140       | 194288, 308439   | 2.52              | 1.98, 3.15    |
| Rhode Island   | 19847        | 16265, 23982     | 2.41              | 1.97, 2.91    |
| South Carolina | 84030        | 65880, 104401    | 2.19              | 1.72, 2.72    |
| South Dakota   | 14354        | 11178, 18036     | 2.26              | 1.76, 2.84    |
| Tennessee      | 110810       | 87799, 137032    | 2.18              | 1.72, 2.69    |
| Texas          | 491066       | 394494, 601754   | 2.39              | 1.92, 2.93    |
| Utah           | 54639        | 44893, 65440     | 2.56              | 2.10, 3.06    |
| Vermont        | 11291        | 9058, 13812      | 2.29              | 1.84, 2.80    |
| Virginia       | 171279       | 136400, 213142   | 2.65              | 2.11, 3.30    |
| Washington     | 128806       | 104612, 157722   | 2.29              | 1.86, 2.80    |
| West Virginia  | 32665        | 25482, 40871     | 2.32              | 1.81, 2.91    |
| Wisconsin      | 104127       | 83831, 127342    | 2.38              | 1.91, 2.90    |
| Wyoming        | 10708        | 8586, 13115      | 2.48              | 1.99, 3.03    |
| Total          | 5845147      | 5161124, 6480992 | 2.38              | 2.10, 2.64    |

**Table 2:** Estimated ASD female prevalence, cases, and associated 95% simulation interval (SI).

| <b>State</b>         | <b>Cases</b> | <b>95% SI</b> | <b>Prevalence</b> | <b>95% SI</b> |
|----------------------|--------------|---------------|-------------------|---------------|
| Alabama              | 16617        | 8134, 29006   | 0.87              | 0.42, 1.51    |
| Alaska               | 2606         | 1397, 4290    | 1.01              | 0.54, 1.66    |
| Arizona              | 20754        | 10660, 35368  | 0.78              | 0.40, 1.34    |
| Arkansas             | 8014         | 4137, 13593   | 0.70              | 0.36, 1.19    |
| California           | 153151       | 82969, 253874 | 1.02              | 0.55, 1.69    |
| Colorado             | 22056        | 12998, 34309  | 1.04              | 0.62, 1.62    |
| Connecticut          | 11264        | 6200, 18179   | 0.80              | 0.44, 1.29    |
| Delaware             | 2901         | 1512, 4758    | 0.76              | 0.39, 1.24    |
| District of Columbia | 2491         | 1274, 4360    | 0.84              | 0.43, 1.48    |
| Florida              | 66149        | 34245, 109481 | 0.79              | 0.41, 1.31    |
| Georgia              | 40397        | 21194, 67450  | 1.00              | 0.53, 1.68    |
| Hawaii               | 4705         | 2453, 7970    | 0.88              | 0.46, 1.48    |
| Idaho                | 5610         | 3085, 9195    | 0.90              | 0.50, 1.48    |
| Illinois             | 46611        | 25915, 75063  | 0.95              | 0.53, 1.53    |
| Indiana              | 25639        | 14136, 41783  | 1.02              | 0.56, 1.65    |
| Iowa                 | 10129        | 5649, 16294   | 0.87              | 0.48, 1.39    |
| Kansas               | 9533         | 5197, 15574   | 0.89              | 0.49, 1.45    |
| Kentucky             | 13158        | 6401, 23254   | 0.77              | 0.37, 1.36    |
| Louisiana            | 15007        | 7979, 24742   | 0.83              | 0.44, 1.38    |
| Maine                | 5727         | 3226, 9073    | 1.07              | 0.60, 1.69    |
| Maryland             | 24591        | 12875, 41473  | 1.03              | 0.54, 1.74    |
| Massachusetts        | 29386        | 15955, 49109  | 1.07              | 0.58, 1.78    |
| Michigan             | 37864        | 19279, 65595  | 0.98              | 0.50, 1.70    |
| Minnesota            | 17895        | 9916, 29149   | 0.86              | 0.48, 1.40    |
| Mississippi          | 9318         | 4410, 16745   | 0.81              | 0.38, 1.45    |
| Missouri             | 21218        | 11946, 33884  | 0.90              | 0.51, 1.44    |
| Montana              | 4030         | 2005, 6904    | 1.02              | 0.51, 1.74    |

Continued on next page

**Table 2:** Estimated ASD female prevalence, cases, and associated 95% simulation interval (SI).

| <b>State</b>   | <b>Cases</b> | <b>95% SI</b>   | <b>Prevalence</b> | <b>95% SI</b> |
|----------------|--------------|-----------------|-------------------|---------------|
| Nebraska       | 4523         | 2150, 8282      | 0.64              | 0.31, 1.18    |
| Nevada         | 11242        | 6011, 18540     | 0.99              | 0.53, 1.63    |
| New Hampshire  | 5559         | 3091, 8942      | 1.05              | 0.58, 1.68    |
| New Jersey     | 33542        | 17846, 55787    | 0.96              | 0.51, 1.59    |
| New Mexico     | 5057         | 2319, 9314      | 0.64              | 0.29, 1.18    |
| New York       | 87988        | 50105, 141702   | 1.12              | 0.64, 1.80    |
| North Carolina | 32993        | 18116, 52764    | 0.82              | 0.45, 1.31    |
| North Dakota   | 1999         | 1082, 3317      | 0.74              | 0.40, 1.23    |
| Ohio           | 40080        | 20885, 66867    | 0.89              | 0.46, 1.48    |
| Oklahoma       | 13068        | 6835, 21747     | 0.89              | 0.47, 1.48    |
| Oregon         | 13702        | 7583, 22396     | 0.85              | 0.47, 1.39    |
| Pennsylvania   | 51081        | 28119, 82026    | 1.02              | 0.56, 1.64    |
| Rhode Island   | 3900         | 2195, 6308      | 0.92              | 0.52, 1.49    |
| South Carolina | 18333        | 9862, 29630     | 0.92              | 0.50, 1.49    |
| South Dakota   | 2880         | 1528, 4816      | 0.92              | 0.49, 1.54    |
| Tennessee      | 21396        | 11540, 35144    | 0.82              | 0.44, 1.34    |
| Texas          | 97988        | 53909, 159542   | 0.94              | 0.52, 1.54    |
| Utah           | 11754        | 6765, 18529     | 1.10              | 0.63, 1.73    |
| Vermont        | 2235         | 1209, 3694      | 0.90              | 0.48, 1.48    |
| Virginia       | 42934        | 21718, 75045    | 1.30              | 0.66, 2.28    |
| Washington     | 20917        | 11239, 34972    | 0.74              | 0.40, 1.24    |
| West Virginia  | 7580         | 3763, 13105     | 1.07              | 0.53, 1.84    |
| Wisconsin      | 18432        | 9712, 31821     | 0.84              | 0.44, 1.45    |
| Wyoming        | 2226         | 1212, 3600      | 1.05              | 0.57, 1.71    |
| Total          | 1178232      | 814428, 1506486 | 0.94              | 0.65, 1.20    |

**Table 3:** Estimated ASD male prevalence, cases, and associated 95% simulation interval (SI).

| <b>State</b>         | <b>Cases</b> | <b>95% SI</b>  | <b>Prevalence</b> | <b>95% SI</b> |
|----------------------|--------------|----------------|-------------------|---------------|
| Alabama              | 66459        | 51866, 82754   | 3.75              | 2.93, 4.67    |
| Alaska               | 10532        | 8186, 13287    | 3.64              | 2.83, 4.59    |
| Arizona              | 104192       | 81486, 130166  | 4.01              | 3.13, 5.01    |
| Arkansas             | 40556        | 31479, 50854   | 3.71              | 2.88, 4.65    |
| California           | 597464       | 473688, 738835 | 4.05              | 3.21, 5.01    |
| Colorado             | 84236        | 67899, 102865  | 3.93              | 3.16, 4.79    |
| Connecticut          | 55416        | 43695, 69815   | 4.14              | 3.26, 5.21    |
| Delaware             | 14049        | 10902, 17747   | 3.96              | 3.07, 5.00    |
| District of Columbia | 9608         | 7475, 12075    | 3.66              | 2.85, 4.60    |
| Florida              | 288285       | 224541, 359171 | 3.65              | 2.85, 4.55    |
| Georgia              | 147115       | 115628, 181930 | 3.92              | 3.08, 4.85    |
| Hawaii               | 20276        | 15877, 25280   | 3.72              | 2.91, 4.64    |
| Idaho                | 23390        | 18572, 28773   | 3.76              | 2.98, 4.62    |
| Illinois             | 188550       | 149157, 234059 | 3.99              | 3.16, 4.95    |
| Indiana              | 93443        | 73944, 115428  | 3.83              | 3.03, 4.73    |
| Iowa                 | 45163        | 36188, 54988   | 3.88              | 3.11, 4.73    |
| Kansas               | 41329        | 32718, 51318   | 3.88              | 3.07, 4.82    |
| Kentucky             | 61660        | 48226, 76723   | 3.74              | 2.92, 4.65    |
| Louisiana            | 59809        | 45952, 75629   | 3.52              | 2.71, 4.46    |
| Maine                | 20403        | 16059, 25373   | 3.98              | 3.13, 4.94    |
| Maryland             | 84890        | 67970, 103542  | 3.85              | 3.08, 4.69    |
| Massachusetts        | 107338       | 84181, 134492  | 4.16              | 3.27, 5.22    |
| Michigan             | 138867       | 109820, 171905 | 3.74              | 2.95, 4.62    |
| Minnesota            | 84249        | 68340, 101938  | 4.07              | 3.30, 4.92    |
| Mississippi          | 39665        | 30400, 50512   | 3.72              | 2.85, 4.74    |
| Missouri             | 82284        | 64507, 102618  | 3.66              | 2.87, 4.56    |
| Montana              | 14836        | 11592, 18471   | 3.68              | 2.88, 4.58    |

Continued on next page

**Table 3:** Estimated ASD male prevalence, cases, and associated 95% simulation interval (SI).

| <b>State</b>   | <b>Cases</b> | <b>95% SI</b>    | <b>Prevalence</b> | <b>95% SI</b> |
|----------------|--------------|------------------|-------------------|---------------|
| Nebraska       | 27682        | 21958, 34337     | 3.96              | 3.14, 4.91    |
| Nevada         | 42583        | 33777, 52576     | 3.75              | 2.97, 4.63    |
| New Hampshire  | 20493        | 16533, 24951     | 3.92              | 3.17, 4.78    |
| New Jersey     | 131141       | 104915, 161536   | 3.95              | 3.16, 4.87    |
| New Mexico     | 27573        | 21030, 34886     | 3.58              | 2.73, 4.53    |
| New York       | 291236       | 233233, 357085   | 3.96              | 3.17, 4.85    |
| North Carolina | 133972       | 103137, 169839   | 3.56              | 2.74, 4.51    |
| North Dakota   | 10699        | 8356, 13350      | 3.68              | 2.87, 4.59    |
| Ohio           | 161661       | 126565, 200205   | 3.76              | 2.95, 4.66    |
| Oklahoma       | 53990        | 42562, 67157     | 3.77              | 2.97, 4.69    |
| Oregon         | 62715        | 49496, 78071     | 3.98              | 3.14, 4.96    |
| Pennsylvania   | 196059       | 149370, 250573   | 4.09              | 3.11, 5.22    |
| Rhode Island   | 15947        | 12902, 19396     | 3.99              | 3.22, 4.85    |
| South Carolina | 65697        | 50102, 83302     | 3.56              | 2.71, 4.51    |
| South Dakota   | 11474        | 8772, 14653      | 3.57              | 2.73, 4.56    |
| Tennessee      | 89414        | 69822, 112192    | 3.62              | 2.83, 4.55    |
| Texas          | 393078       | 310729, 488796   | 3.87              | 3.06, 4.81    |
| Utah           | 42885        | 34900, 51573     | 4.01              | 3.26, 4.82    |
| Vermont        | 9056         | 7151, 11185      | 3.73              | 2.94, 4.60    |
| Virginia       | 128345       | 102458, 158099   | 4.06              | 3.24, 5.00    |
| Washington     | 107889       | 86206, 133607    | 3.83              | 3.06, 4.75    |
| West Virginia  | 25085        | 19216, 31705     | 3.61              | 2.76, 4.56    |
| Wisconsin      | 85695        | 68294, 105247    | 3.93              | 3.13, 4.82    |
| Wyoming        | 8482         | 6692, 10549      | 3.83              | 3.03, 4.77    |
| Total          | 4666915      | 4065175, 5198322 | 3.87              | 3.37, 4.31    |

**Table 4:** The NSCH age 6-17 male versus female prevalence ratio (PR) and prevalence difference (PD), and associated 95% simulation interval (SI) by state and the US.

| <b>State</b>         | <b>PR</b> | <b>PR 95% SI</b> | <b>PD</b> | <b>PD 95% SI</b> |
|----------------------|-----------|------------------|-----------|------------------|
| Alabama              | 4.82      | 2.34, 9.26       | 2.88      | 1.83, 3.94       |
| Alaska               | 3.93      | 2.05, 7.00       | 2.63      | 1.59, 3.72       |
| Arizona              | 5.62      | 2.83, 10.34      | 3.22      | 2.21, 4.31       |
| Arkansas             | 5.82      | 2.96, 10.71      | 3.01      | 2.05, 4.02       |
| California           | 4.30      | 2.27, 7.58       | 3.03      | 1.96, 4.11       |
| Colorado             | 4.00      | 2.32, 6.64       | 2.88      | 1.95, 3.87       |
| Connecticut          | 5.58      | 3.02, 9.70       | 3.34      | 2.33, 4.46       |
| Delaware             | 5.70      | 2.95, 10.35      | 3.20      | 2.17, 4.31       |
| District of Columbia | 4.78      | 2.36, 8.77       | 2.82      | 1.82, 3.83       |
| Florida              | 5.03      | 2.63, 9.10       | 2.86      | 1.92, 3.85       |
| Georgia              | 4.26      | 2.21, 7.64       | 2.92      | 1.86, 3.99       |
| Hawaii               | 4.64      | 2.39, 8.35       | 2.85      | 1.87, 3.86       |
| Idaho                | 4.49      | 2.43, 7.87       | 2.85      | 1.91, 3.83       |
| Illinois             | 4.54      | 2.44, 7.88       | 3.04      | 2.03, 4.11       |
| Indiana              | 4.06      | 2.20, 7.03       | 2.82      | 1.81, 3.86       |
| Iowa                 | 4.83      | 2.66, 8.25       | 3.02      | 2.09, 3.94       |
| Kansas               | 4.71      | 2.52, 8.21       | 2.99      | 2.03, 4.01       |
| Kentucky             | 5.42      | 2.62, 10.30      | 2.97      | 1.98, 3.98       |
| Louisiana            | 4.59      | 2.39, 8.09       | 2.69      | 1.71, 3.71       |
| Maine                | 4.00      | 2.19, 6.87       | 2.91      | 1.83, 4.00       |
| Maryland             | 4.07      | 2.11, 7.36       | 2.81      | 1.78, 3.83       |
| Massachusetts        | 4.23      | 2.21, 7.44       | 3.10      | 1.96, 4.28       |
| Michigan             | 4.19      | 2.10, 7.76       | 2.75      | 1.70, 3.78       |
| Minnesota            | 5.12      | 2.78, 8.84       | 3.21      | 2.27, 4.15       |
| Mississippi          | 5.17      | 2.43, 10.00      | 2.92      | 1.84, 4.02       |
| Missouri             | 4.34      | 2.39, 7.52       | 2.75      | 1.82, 3.76       |
| Montana              | 4.00      | 1.98, 7.57       | 2.66      | 1.59, 3.72       |

Continued on next page

**Table 4:** The NSCH age 6-17 male versus female prevalence ratio (PR) and prevalence difference (PD), and associated 95% simulation interval (SI) by state and the US.

| <b>State</b>   | <b>PR</b> | <b>PR 95% SI</b> | <b>PD</b> | <b>PD 95% SI</b> |
|----------------|-----------|------------------|-----------|------------------|
| Nebraska       | 6.92      | 3.20, 13.38      | 3.31      | 2.34, 4.33       |
| Nevada         | 4.11      | 2.19, 7.28       | 2.76      | 1.77, 3.78       |
| New Hampshire  | 4.04      | 2.21, 6.96       | 2.88      | 1.88, 3.88       |
| New Jersey     | 4.49      | 2.37, 7.94       | 3.00      | 2.01, 4.03       |
| New Mexico     | 6.32      | 2.86, 12.54      | 2.94      | 1.95, 3.98       |
| New York       | 3.80      | 2.09, 6.43       | 2.84      | 1.79, 3.86       |
| North Carolina | 4.67      | 2.52, 8.29       | 2.74      | 1.78, 3.78       |
| North Dakota   | 5.39      | 2.83, 9.49       | 2.94      | 2.02, 3.94       |
| Ohio           | 4.62      | 2.39, 8.26       | 2.87      | 1.89, 3.88       |
| Oklahoma       | 4.62      | 2.40, 8.30       | 2.88      | 1.90, 3.91       |
| Oregon         | 5.05      | 2.71, 8.71       | 3.13      | 2.13, 4.20       |
| Pennsylvania   | 4.32      | 2.31, 7.73       | 3.07      | 1.94, 4.31       |
| Rhode Island   | 4.66      | 2.58, 7.89       | 3.07      | 2.13, 4.02       |
| South Carolina | 4.18      | 2.22, 7.47       | 2.64      | 1.62, 3.69       |
| South Dakota   | 4.23      | 2.17, 7.68       | 2.65      | 1.62, 3.76       |
| Tennessee      | 4.81      | 2.57, 8.51       | 2.81      | 1.86, 3.79       |
| Texas          | 4.42      | 2.37, 7.67       | 2.92      | 1.93, 3.96       |
| Utah           | 3.89      | 2.20, 6.53       | 2.91      | 1.96, 3.89       |
| Vermont        | 4.52      | 2.38, 7.99       | 2.83      | 1.86, 3.81       |
| Virginia       | 3.43      | 1.70, 6.24       | 2.76      | 1.49, 3.92       |
| Washington     | 5.60      | 2.93, 9.97       | 3.09      | 2.19, 4.07       |
| West Virginia  | 3.75      | 1.84, 7.03       | 2.54      | 1.42, 3.68       |
| Wisconsin      | 5.14      | 2.60, 9.19       | 3.09      | 2.11, 4.08       |
| Wyoming        | 3.93      | 2.12, 6.94       | 2.78      | 1.74, 3.85       |
| Total          | 4.22      | 3.09, 6.01       | 2.93      | 2.36, 3.47       |
